# Supplementary material for: Olfactory System Morphology Suggests Colony Size Drives Trait Evolution in Odorous Ants (Formicidae: Dolichoderinae)
Source: Frontiers journal article supplement (doi:10.3389/fevo.2021.733023), 2021-10-28
Supplement: Data_Sheet_1.docx [file Data_Sheet_1.docx]

Supplementary Material

**MATERIALS AND METHODS**

*Gas chromatography mass spectrometry (GC-MS)*

Chemical analysis of *Dorymyrmex* compounds was carried out at the Analytical & Biological Mass Spectrometry facility at the University of Arizona in the following manner: First, 2 µL of the DCM control was injected onto a Shimadzu SHRXI GC column and separated by increasing the temperature from 35-300oC over 30 minutes. Following this, 2 µL from the supernatant of the centrifuged control or sample was introduced into a Shimadzu QP2010S mass spectrometer and ionized by Electron Impact. Positive ions from m/z 35-650 were monitored. Identification of peaks was accomplished by comparison to the National Institute of Standards and Technology (NIST) mass spectral library (Shen et al. 2016). The compound with the highest similarity (expressed as a percent) to a given peak is reported here as its likely identity. Peaks without any library matches above 85% were considered unidentified.

*Comparison with identified compounds*

            Existing reports of gland contents in the literature were consulted to determine potential gland sources of compounds identified from *D. bicolor* and *D. insanus*. Gland contents have been reported from Dolichoderine ants in the genera *Azteca* (Wheeler et al. 1975), *Dolichoderus* (Cavill and Hinterberger 1960; Attygalle et al. 1998), *Dorymyrmex* (as *Conomyrma* in Blum and Warter 1966; Wheeler et al. 1977), *Forelius* (Wilson and Pavan 1959; Blum et al. 1963; Blum and Warter 1966), *Linepithema* (Choe et al. 2012), *Liometopum* (Casnati et al. 1964 in Blum 1969), *Tapinoma* (Tomalski et al. 1987; Simon and Hefetz 1991).

**TABLES**

**Table S1**.Colony locations for ants used in this study

| Genus | species | Colony | Latitude | Longitude | Description | | Habitat |
| --- | --- | --- | --- | --- | --- | --- | --- |
| *Dorymyrmex* | *bicolor* | GM3 | 32.27462 | -110.90685 | George Mehl Park | Recreational Park | | |
|  |  | GM4 | 32.27535 | -110.90759 | George Mehl Park | Recreational Park | | |
|  |  | GM1 | 32.27623 | -110.90609 | George Mehl Park | Recreational Park | | |
|  |  | RI1 | 32.28814 | -110.95438 | Rillito Race Track | Recreational Park | | |
|  |  | RI2 | 32.29175 | -110.96037 | Rillito Race Track | Recreational Park | | |
|  |  | SB3 | 32.34923 | -111.09397 | Crossroads Park | Recreational Park | | |
|  |  | SB1 | 32.34961 | -111.09463 | Crossroads Park | Recreational Park | | |
| *Dorymyrmex* | *insanus* | SR4 | 32.20541 | -110.96516 | Santa Rita | Urban | | |
|  |  | SR3 | 32.20564 | -110.96522 | Santa Rita | Urban | | |
|  |  | RP1 | 32.20718 | -110.91921 | Reid Park | Recreational Park | | |
|  |  | TP2 | 32.21115 | -110.89696 | Toumey Park | Recreational Park | | |
|  |  | TP1 | 32.21126 | -110.89791 | Toumey Park | Recreational Park | | |
|  |  | BR1 | 32.21138 | -110.97476 | Barrio Santa Rosa | Urban | | |
|  |  | SC1 | 32.21542 | -110.9053 | San Clemente | Urban | | |
|  |  | BF1 | 32.27156 | -110.91919 | Brandi Fenton Park | Recreational Park | | |
|  |  | GM9 | 32.2755 | -110.90809 | George Mehl Park | Recreational Park | | |
| *Forelius* | *mccooki* | SR1 | 32.20572 | -110.9652 | Santa Rita | Urban | | |
|  |  | RP2 | 32.20718 | -110.91921 | Reid Park | Urban | | |
|  |  | PS1 | 32.22926 | -110.95692 | UA Park Student Union | Urban | | |
|  |  | UA1 | 32.23184 | -110.9531 | UA Old Main | Urban | | |
|  |  | GM7 | 32.2748 | -110.90717 | George Mehl Park | Recreational Park | | |
|  |  | GM8 | 32.27628 | -110.90604 | George Mehl Park | Recreational Park | | |
|  |  | SB2 | 32.3497 | -111.09486 | Crossroads Park | Recreational Park | | |

**Table S2**. ANOVA models of sensory system scaling in antennal length, club surface area, eye area, and ommatidia number. Area variables natural log-transformed for analysis.

| Model | SumSq | df | F | p | R2 |
| --- | --- | --- | --- | --- | --- |
| Antennal Length |  |  |  |  | 0.98 |
| HW | 0.24946 | 1 | 46.915 | < 0.001 |  |
| Taxa | 0.25455 | 2 | 23.936 | < 0.001 |  |
| HW*Taxa | 0.082884 | 2 | 10.702 | < 0.001 |  |
| Residuals | 0.193617 | 50 |  |  |  |
|  |  |  |  |  |  |
| Club Surface Area |  |  |  |  | 0.89 |
| HW | 0.02521 | 1 | 1.2336 | 0.27 |  |
| Taxa | 0.21568 | 2 | 5.2778 | 0.009 |  |
| HW*Taxa | 0.33407 | 2 | 13.1356 | < 0.001 |  |
| Residuals | 0.48322 | 38 |  |  |  |
|  |  |  |  |  |  |
| Eye Area |  |  |  |  | 0.99 |
| HW | 0.15511 | 2 | 70.774 | < 0.001 |  |
| Taxa | 2.4673 | 1 | 562.883 | < 0.001 |  |
| HW*Taxa | 0.06531 | 2 | 14.899 | < 0.001 |  |
| Residuals | 0.06794 | 31 |  |  |  |
|  |  |  |  |  |  |
| Ommatidia |  |  |  |  | 0.97 |
| HW | 1683.46 | 1 | 60.985 | < 0.001 |  |
| Taxa | 2225.82 | 2 | 40.316 | < 0.001 |  |
| Residuals | 910.94 | 33 |  |  |  |

**Table S3**. Parameters from generalized linear model with pseudo-Poisson distribution testing the relationship between head width and sensilla density across three species of ants. Pseudo-R2 obtained by dividing residual deviance by null deviance.

|  | Intercept | Slope | pseudo-R2 |
| --- | --- | --- | --- |
| **Penultimate** |  |  |  |
| Non-basiconic | 5.55 | -0.89732 | 0.674 |
| Basiconic | 2.521 | -1.2052 | 0.389 |
| **Club** |  |  |  |
| Non-basiconic | 5.57 | -0.56113 | 0.491 |
| Basiconic | 2.9097 | -0.4907 | 0.12 |

**Table S4**. Compounds identified from two species of *Dorymyrmex*. PN = peak number, RT = retention time, G = gaster, HT = head and thorax.

| PN | RT | *D. bicolor* | | *D. insanus* | | PN | RT | *D. bicolor* | | *D. insanus* | |
| --- | --- | --- | --- | --- | --- | --- | --- | --- | --- | --- | --- |
|  |  | G | HT | G | HT |  |  | G | HT | G | HT |
| 1 | 4.25 |  |  | x |  | 30 | 15.34 |  |  |  | x |
| 2 | 5.5 |  |  | x |  | 31 | 15.49 |  | x | x | x |
| 3 | 6.41-6.43 | x | x |  | x | 32 | 15.55-15.56 | x |  | x | x |
| 4 | 6.53-6.56 | x |  | x |  | 33 | 15.64 | x |  | x | x |
| 5 | 7.21 | x |  |  |  | 34 | 16.07 | x |  | x | x |
| 6 | 7.37 | x |  |  |  | 35 | 16.51 |  | x |  | x |
| 7 | 8.09 | x |  | x |  | 36 | 16.55 | x | x | x | x |
| 8 | 8.34 | x |  |  |  | 37 | 16.7, 16.71 |  |  | x | x |
| 9 | 8.75 | x |  |  |  | 38 | 16.88, 16.89 |  |  | x | x |
| 10 | 8.87 | x |  |  |  | 39 | 16.93, 16.94 |  |  | x | x |
| 11 | 9.22 |  |  | x |  | 40 | 17.01, 17.02 |  |  | x | x |
| 12 | 9.10-9.48 | x |  |  |  | 41 | 17.07 | x | x | x | x |
| 13 | 9.23-9.4 |  |  | x |  | 42 | 17.19 |  |  |  | x |
| 14 | 9.46-9.51 | x |  | x |  | 43 | 17.25 |  | x | x | x |
| 15 | 10 | x |  | x |  | 44 | 17.55, 17.6 | x | x |  |  |
| 16 | 10.09 | x |  | x |  | 45 | 17.67, 17.68 | x | x | x | x |
| 17 | 10.21 | x |  |  |  | 46 | 17.87-17.89 | x | x | x | x |
| 18 | 10.33-10.43 | x |  | x |  | 47 | 18.06-18.07 |  | x | x | x |
| 19 | 10.5-10.51 | x |  | x |  | 48 | 18.12 |  |  | x |  |
| 20 | 10.76 | x |  |  |  | 49 | 18.19 | x | x |  |  |
| 21 | 11.34-11.36 | x | x | x | x | 50 | 18.21, 18.22 |  |  | x | x |
| 22 | 12.48-12.49 |  | x | x | x | 51 | 18.32 | x | x |  |  |
| 23 | 12.82 |  | x |  | x | 52 | 18.37-18.38 | x | x | x | x |
| 24 | 13.2 | x |  | x |  | 53 | 18.61 |  | x |  |  |
| 25 | 13.44 | x |  | x |  | 54 | 19.06 |  | x |  |  |
| 26 | 14.08 | x | x | x | x | 55 | 19.12 | x | x |  |  |
| 27 | 14.18 | x |  | x |  | 56 | 19.21, 19.22 | x |  | x | x |
| 28 | 14.23 |  |  | x |  | 57 | 19.5 |  |  | x |  |
| 29 | 14.95 |  |  |  | x | 58 | 19.76,19.77 | x |  | x |  |

**Table S5**. Putative compounds isolated from *Dorymyrmex* ants. PN = peak number, MW= molecular mass, S = Similarity to sequence in NIST database.

| PN | Putative identity | MM | S | Gland | Chemical class |
| --- | --- | --- | --- | --- | --- |
| 1 | 2-Hexanone | 100 | 96 | Pygydial | Ketone |
| 2 | 2-Hexanone | 114 | 85 | Pygydial | Ketone |
| 3 | Diethylene glycol | 106 | 96 |  |  |
| 4 | 6-Methyl-5-hepten-2-one; Sulcatone | 126 | 90 | Pygydial | Ketone |
| 5 | 3-Ethenyl-3-methylcyclopentanone | 124 | 94 | Pygydial | Cyclic ketone |
| 6 | *unidentified* |  |  |  |  |
| 7 | Citronellal | 154 | 96 |  | Monoterpenoid |
| 8 | *unidentified* |  |  |  |  |
| 9 | *unidentified* |  |  |  |  |
| 10 | *unidentified* |  |  |  |  |
| 11 | *unidentified* |  |  |  |  |
| 12 | *unidentified* | 236 | 84 |  |  |
| 13 | *unidentified* | 236 | 84 |  |  |
| 14 | *unidentified;* Velvione-like |  |  |  |  |
| 15 | 2-Butyl-2,7-octadien-1-ol | 182 | 85 |  | Fatty alcohol |
| 16 | Limonene | 152 | 85 |  | Cyclic monoterpene |
| 17 | *unidentified* | 168 |  |  |  |
| 18 | Iridomyrmecin | 168 | 91 | Pygydial | Monoterpenoid |
| 19 | *Cyclic ketone* |  | 86 |  | Cyclic ketone |
| 20 | Pentadecane | 212 | 94 | Dufour | Acyclic alkane |
| 21 | *unidentified* |  |  |  |  |
| 22 | *unidentified* |  |  |  |  |
| 23 | Hexadecanol; *multiple matches* | 242 | 88 |  | Palmityl alcohol |
| 24 | Hexadecanoic acid | 256 | 96 |  | Fatty acid |
| 25 | 1-Hexadcenol acetate; *multiple matches* | 284 | 90 |  | Palmityl alcohol |
| 26 | Oleic acid | 282 | 95 |  | Fatty acid |
| 27 | Steric acid; *multiple matches* | 284 | 95 |  | Fatty acid |
| 28 | *unidentified* |  |  |  |  |
| 29 | *unidentified* |  |  |  |  |
| 30 | *unidentified* |  |  |  |  |

**Table S5** *cont.* Putative compounds isolated from *Dorymyrmex* ants. PN = peak number, MW= molecular mass, S = Similarity to sequence in NIST database.

| PN | Putative identity | MM | S | Gland | Chemical class |
| --- | --- | --- | --- | --- | --- |
| 31 | *unidentified* |  |  |  |  |
| 32 | Dehydroabietic acid | 300 | 89 |  | Diterpenoid |
| 33 | *Acyclic alkane* |  | 94 | Dufour | Acyclic alkane |
| 34 | Heneicosane | 296 | 96 | Dufour | Acyclic alkane |
| 35 | 9-Octadecenoic acid (Z)-, 2-butoxyethyl ester | 382 | 86 | Pavan | Ester |
| 36 | Hexacosane; *multiple matches* | 366 | 95 | Dufour | Acyclic alkane |
| 37 | Tetratetracontane | 618 | 93 | Dufour | Acyclic alkane |
| 38 | Hentriacontane; *multiple matches* | 436 | 92 |  | Acyclic alkane |
| 39 | 2-methyloctacosane | 408 | 94 |  |  |
| 40 | *unidentified* |  |  |  |  |
| 41 | Heneicosane | 296 | 93 |  | Acyclic alkane |
| 42 | Squalene | 410 | 96 |  | Isoprenoid |
| 43 | Heneicosane; *multiple matches* |  | 94 | Dufour | Acyclic alkane |
| 44 | Octacosanol; *multiple matches* | 410 | 96 |  | Fatty alcohol |
| 45 | Heneicosane; *multiple matches* |  |  | Dufour | Acyclic alkane |
| 46 | Tetratetracontane | 618 | 94 | Dufour | Acyclic alkane |
| 47 | 2-methyloctacosane | 408 | 91 |  |  |
| 48 | Petacosane; *multiple matches* | 352 | 92 | Dufour | Acyclic alkane |
| 49 | 2-methyloctacosane; *multiple matches* | 408 | 93 | Dufour | Acyclic alkane |
| 50 | 2-methyloctacosane; *multiple matches* | 408 | 91 | Dufour | Acyclic alkane |
| 51 | 1-Heptacosanol | 396 | 96 |  |  |
| 52 | Tetratetracontane; multiple matches | 618 | 95 | Dufour | Acyclic alkane |
| 53 | *unidentified* |  |  |  |  |
| 54 | Octacosanol; *multiple matches* |  | 92 |  | Fatty alcohol |
| 55 | Octacosanol; *multiple matches* |  | 96 |  | Fatty alcohol |
| 56 | Heneicosane; *multiple matches* |  | 90 | Dufour | Acyclic alkane |
| 57 | *unidentified* |  |  |  |  |
| 58 | Cholesterol | 386 | 90 |  | Sterol |

**Table S6**. Summary of compound distribution within and similarity across two species of *Dorymyrmex*. HT = head and thorax; Entire denotes the compound was found in both body part samples.

|  | Gaster | HT | Entire | Unique | Total |
| --- | --- | --- | --- | --- | --- |
| *D. bicolor* | 23 | 8 | 12 | 14 | 43 |
| *D. insanus* | 18 | 6 | 20 | 15 | 44 |

**FIGURES**


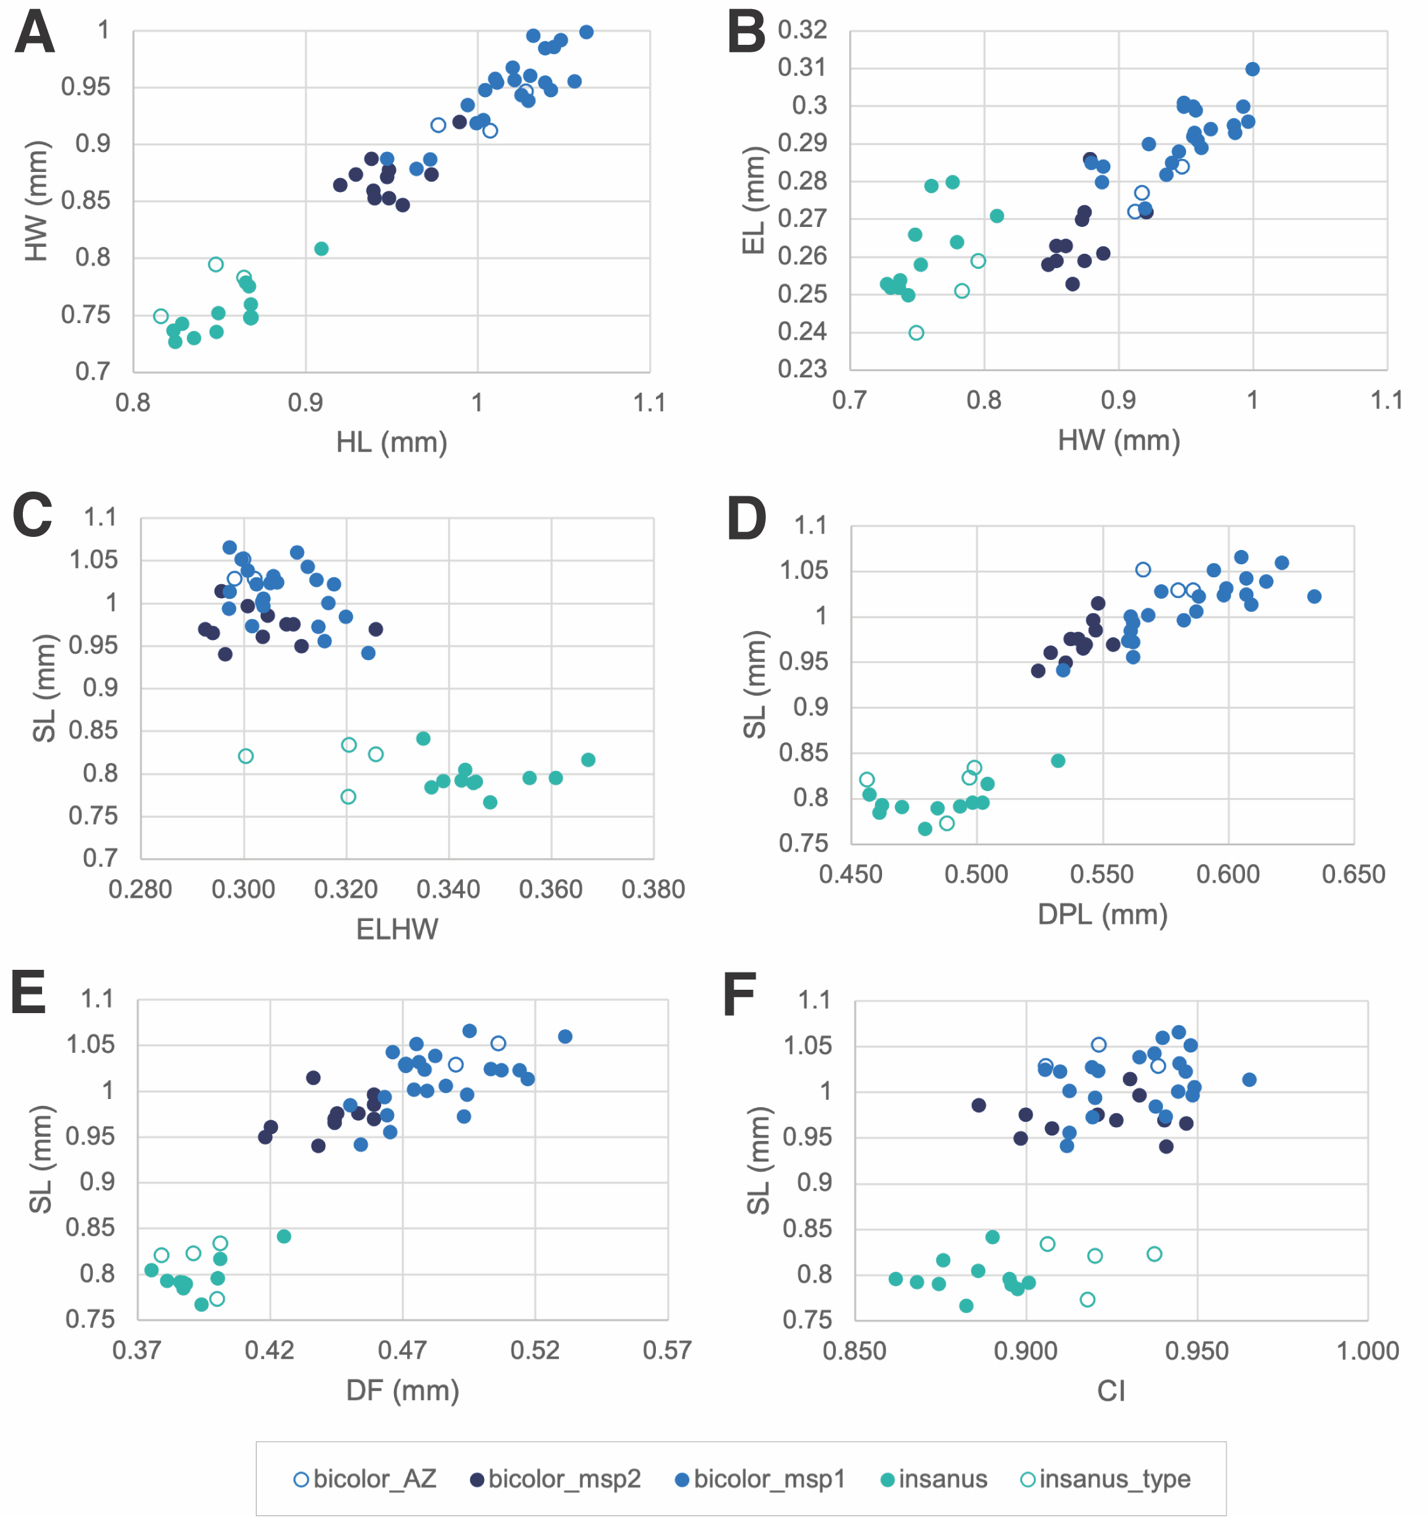


**Figure S1.** A variety of morphometric measurements of *Dorymyrmex bicolor* and *insanus,* with comparison to reference material. Solid circles are samples from the present study: *D. insanus* (cyan); *D. bicolor,* morphotype 1 (blue); and *D. bicolor,* morphotype 2 (dark blue). Open circles are reference specimens: *D. insanus* neoparatypes (cyan) and type-like *D. bicolor* collected near the type locality, Phoenix, in Gila County, Arizona, USA (blue). Abbreviations of measurements (in mm) and indices shown on axes: HW, head width; HL, head length; EL, eye length; SL, antennal scape length; ELHW, ratio of eye length: head width; DPL, length of diagonal propodeal line; DF, length of propodeum declivitous face; CI, cephalic index, i.e. the ratio of head width: head length. DPL and DF are useful proxies for body size.


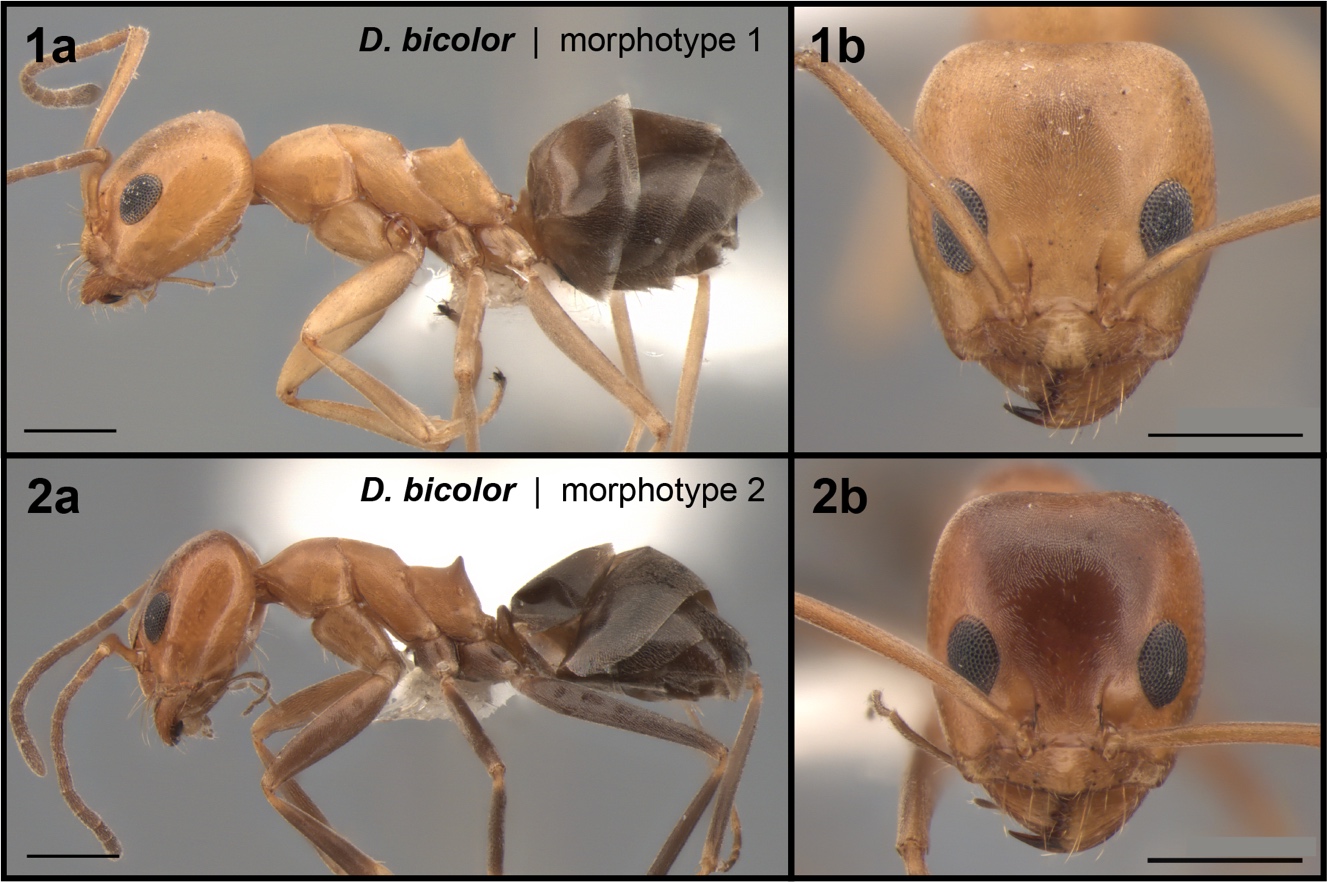


**Figure S2**. Comparison of two *Dorymyrmex bicolor* morphotypes observed among our sampled populations. Columns (1a-2a and 1b-2b) each show photos to scale; additionally, all scale bars are equal to 0.5 mm. (1) *D. bicolor* workers of morphotype 1 are lighter in color, larger, and more robust, with wider heads and shorter propodeal processes. The posterior vertex of the head is typically slightly concave (as in 1b). (2) *D. bicolor* workers of morphotype 2 are markedly darker, with generally smaller heads and mesosomata and a more angular mesosomal profile. The vertex of the head is typically straight (as in 2b).

**Figure S3**. Ommatidia density differences across three species of dolichoderine ants. Statistical comparison made using analysis of variance on generalize linear model with a quasi-Poisson likelihood that included taxa and head width as predictors. *** = p < 0.001


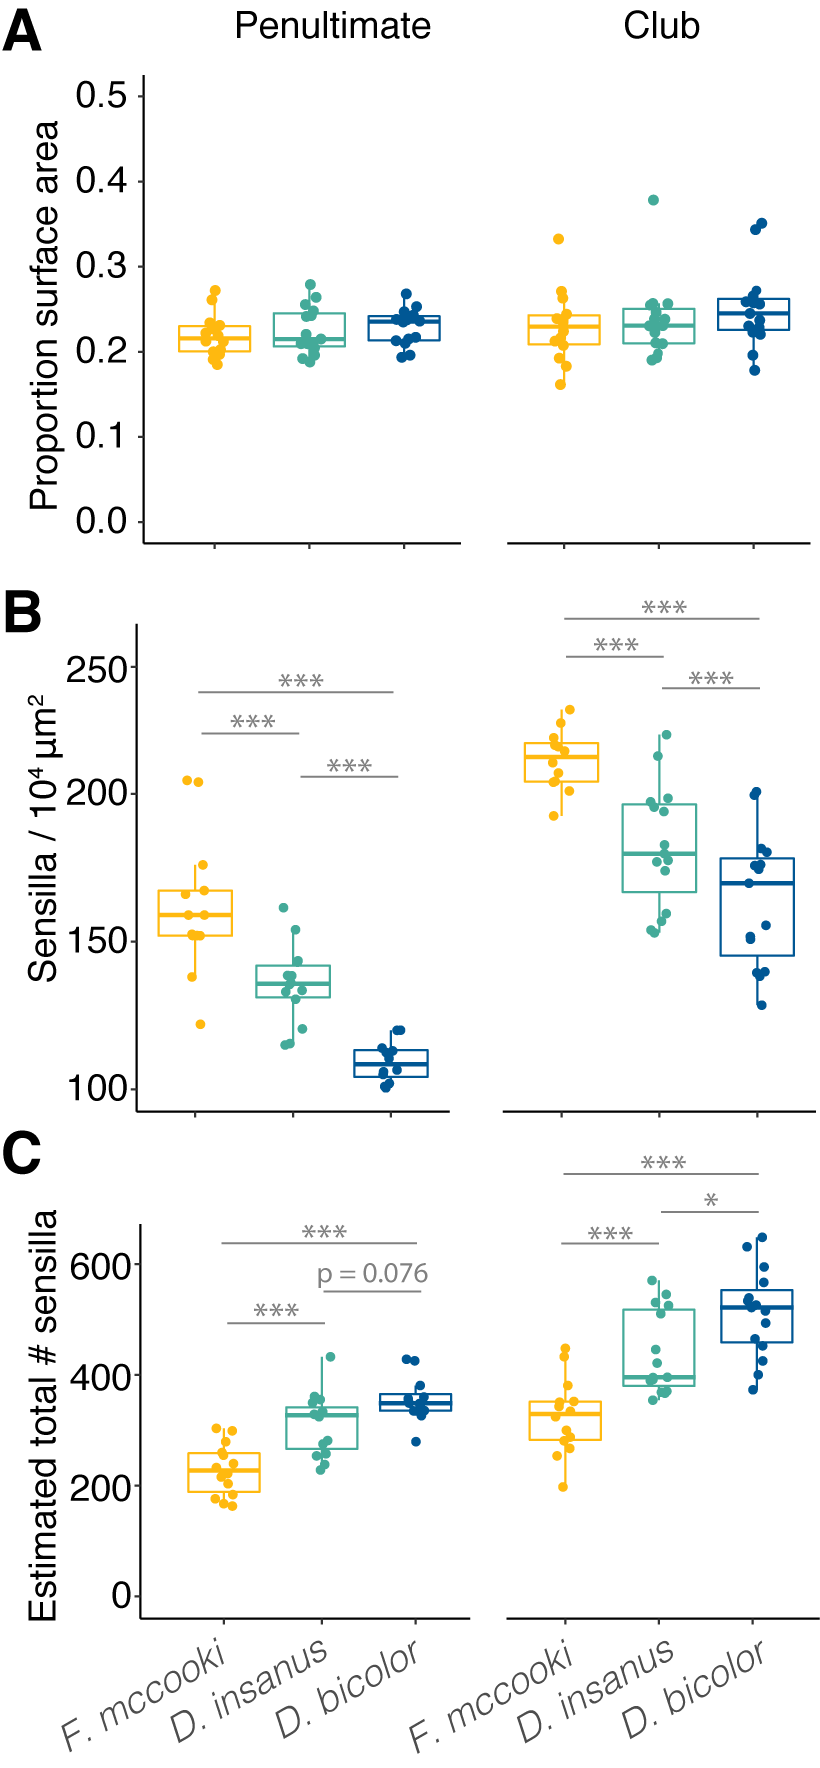


**Figure S4**. Sampling effort and total sensilla density across three species of dolichoderine ants. (A) Sampling effort as estimated by proportion of total surface area sampled does not differ significantly across species. (B) Total sensilla density on each segment varies predictably with body size across species. (C) Estimated total number of sensilla on each antennal segment largely scales positively with body size across species. Species ranked by head width along the x-axis. Statistical comparison made using analysis of variance on generalize linear model with a quasi-Poisson likelihood that included taxa as a predictor, followed by post-hoc comparisons using Tukey’s Honestly Significant Difference. * = p < 0.05; *** = p < 0.001


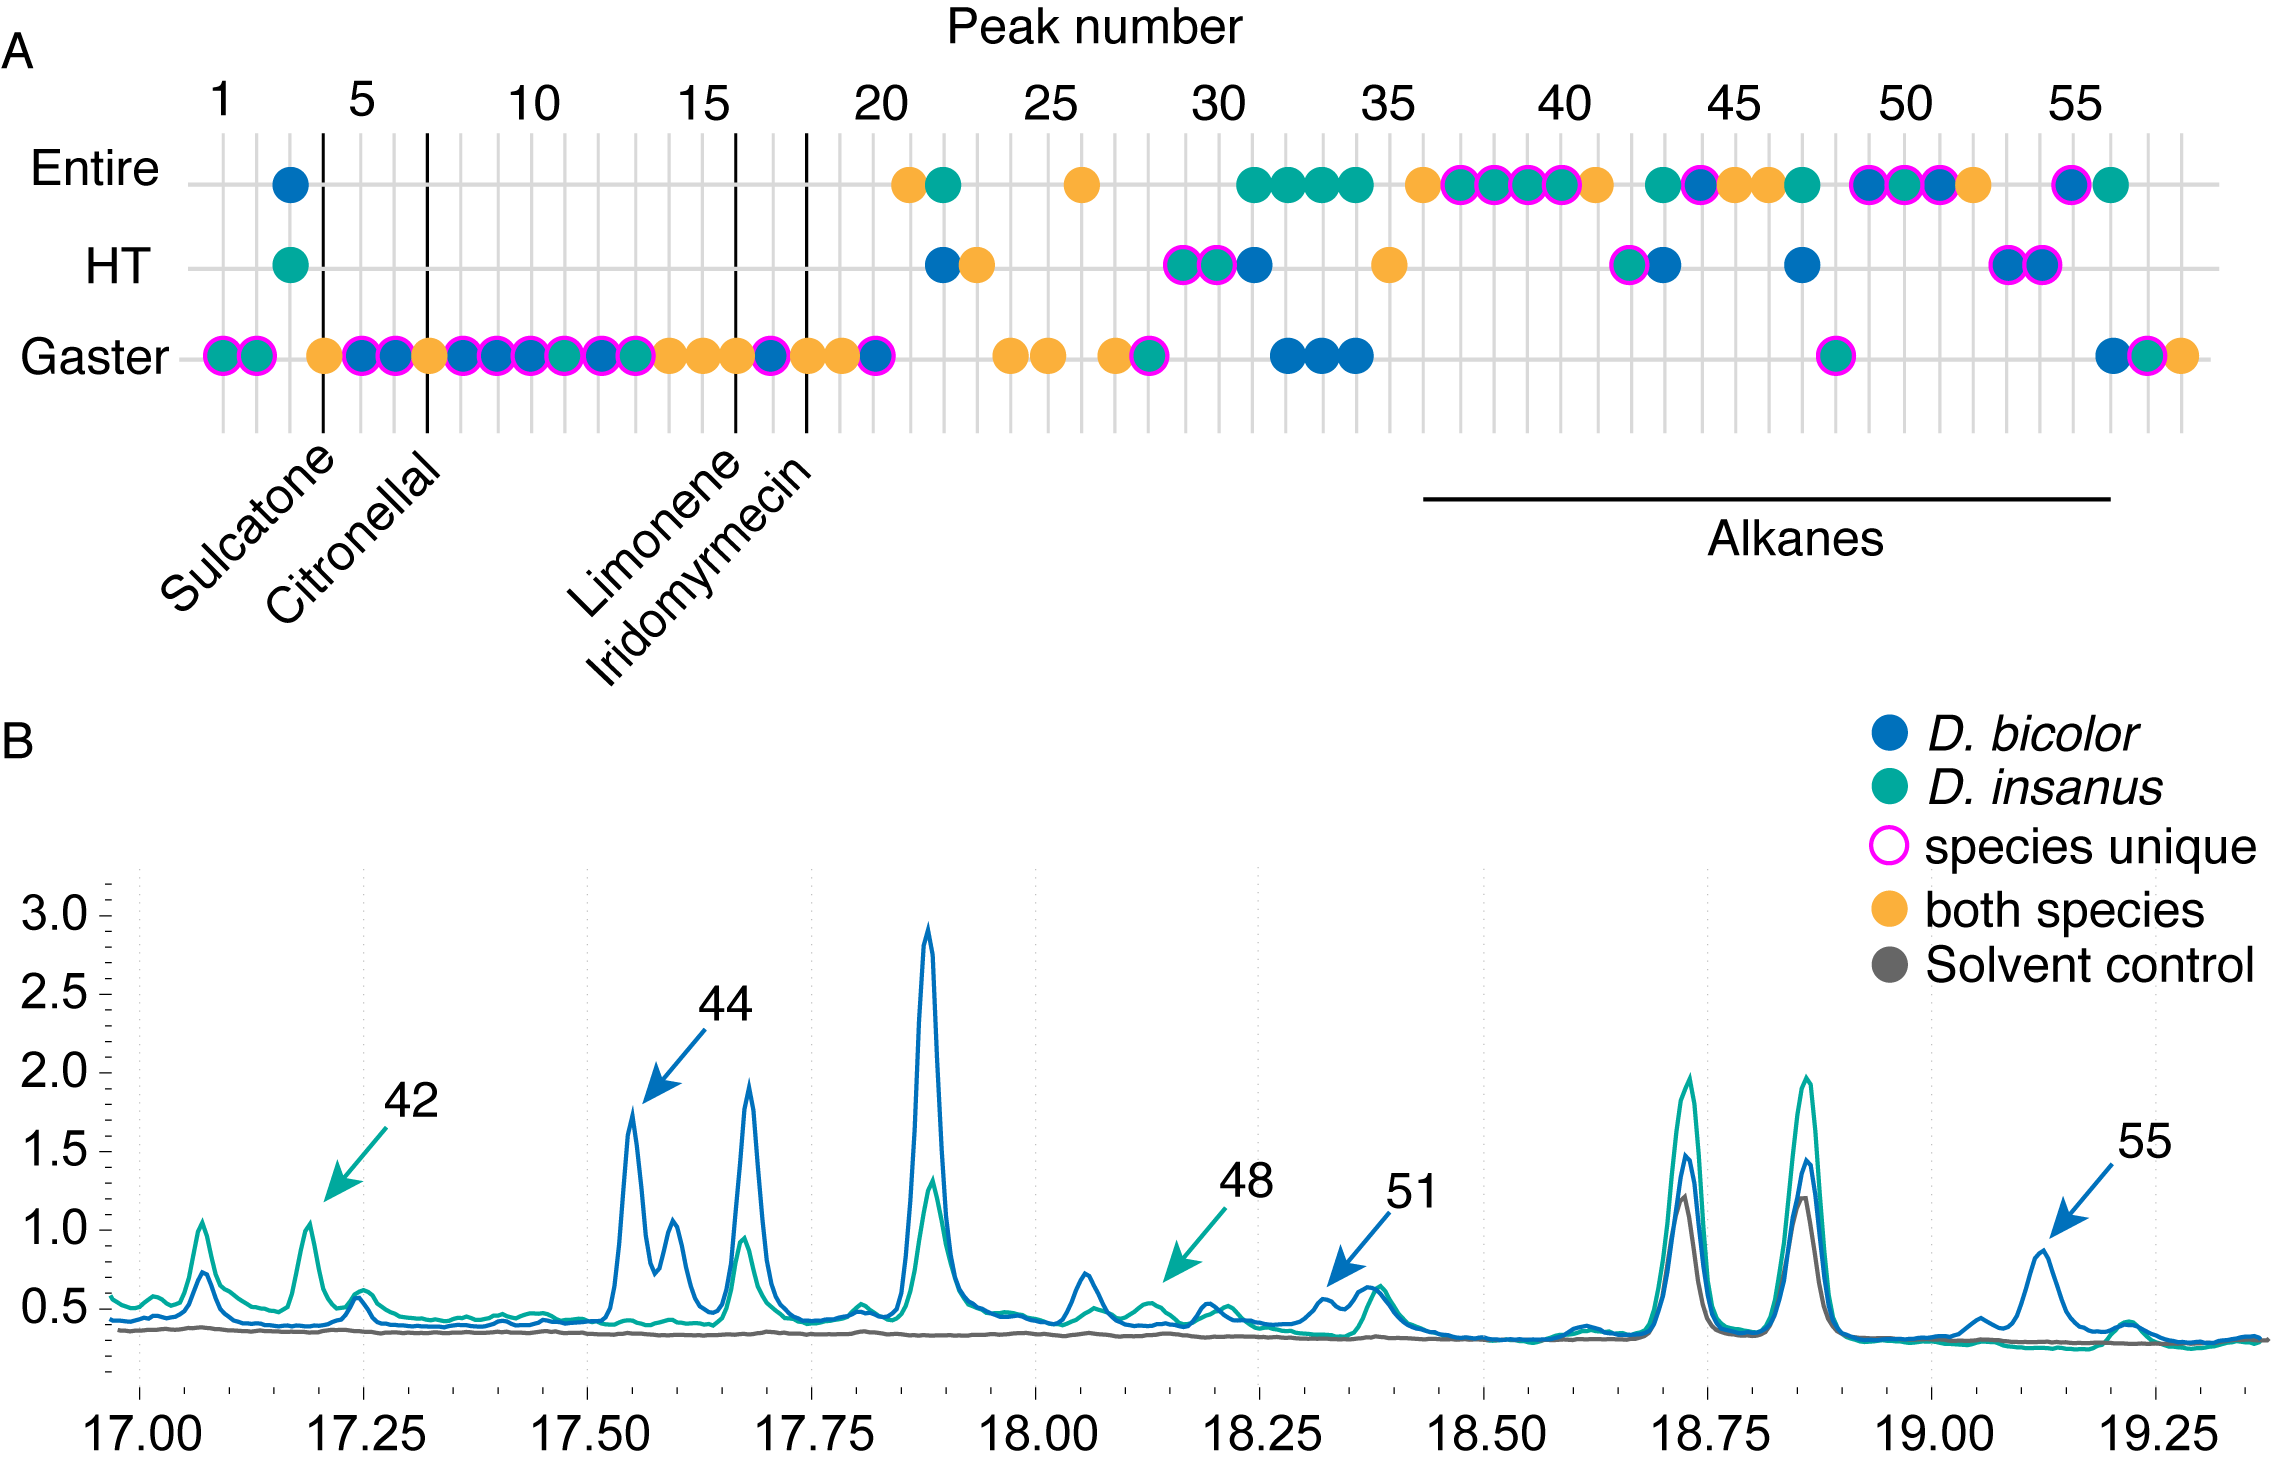


**Figure S5**. Chemical compounds isolated from *Dorymyrmex* species. (A) Compounds arranged by peak number and body part from which they were isolated and colored based on species identity for each body part. (B) Example spectrograms from GC-MS of gaster contents of *D. insanus* (cyan) and *D.bicolor* (blue) with peaks unique to each indicated with arrows and peak numbers.

**REFERENCES**

Attygalle AB, Mutti A, Rohe W, Maschwitz U, Garbe W, Bestmann HJ (1998) Trail pheromone from the pavan gland of the ant Dolichoderus thoracicus (Smith). Naturwissenschaften 85:275–277. doi: 10.1007/s001140050498

Blum MS (1969) Alarm Pheromones. Annu Rev Entomol 14:57–80. doi: 10.1146/annurev.en.14.010169.000421

Blum MS, Warter SL (1966) Chemical Releasers of Social Behavior. VII. The Isolation of 2-Heptanone from Conomyrma pyramica (Hymenoptera: Formicidae: Dolichoderinae) and Its Modus Operandi as a Releaser of Alarm and Digging Behavior1. Ann Entomol Soc Am 59:774–779. doi: 10.1093/aesa/59.4.774

Blum MS, Warter SL, Monroe RS, Chidester JC (1963) Chemical releasers of social behaviour-I. Methyl-n-amyl ketone in Iridomyrmex pruinosus (Roger) (Formicidae: Dolichoderinae). J Insect Physiol 9:881–885. doi: 10.1016/0022-1910(63)90047-7

Cavill GWK, Hinterberger H (1960) The chemistry of ants. IV. Terpenoid constituents of some Dolichoderus and Iridomyrmex species. Aust J Chem. doi: 10.1071/CH9600514

Choe DH, Villafuerte DB, Tsutsui ND (2012) Trail Pheromone of the Argentine Ant, Linepithema humile (Mayr) (Hymenoptera: Formicidae). PLoS One 7:. doi: 10.1371/journal.pone.0045016

Simon T, Hefetz A (1991) Trail-following responses of Tapinoma simrothi (Formicidae: Dolichoderinae) to pygidial gland extracts. Insectes Soc 38:17–25. doi: 10.1007/BF01242709

Tomalski MD, Blum MS, Jones TH, Fales HM, Howard DF, L. P (1987) Chemistry and functions of exocrine secretions of the ants Tapinoma melanocephalum and T. erraticum. J Chem Ecol 13:253–263

Wheeler J, Evans SL, Blum M, Torgerson R (1975) Cyclopentyl Ketones: Identification. 181:254–256. doi: 10.1126/science.187.4173.254

Wheeler JW, Olagbemiro T, Nash A, Blum MS (1977) Actinidine from the defensive secretions of dolichoderine ants. J Chem Ecol. doi: 10.1007/BF00988439

Wilson EO, Pavan M (1959) Glandular Sources and Specificity of Some Chemical Releasers of Social Behavior in Dolichoderine Ants. Psyche A J Entomol 66:70–76. doi: 10.1155/1959/45675
